# Supplementary material for: Effects of choral singing versus health education on cognitive decline and aging: a randomized controlled trial
Source: publisher site journal article supplement (doi:10.18632/aging.202374), 2020-12-18
Supplement: Supplementary file [file aging-v12i24-202374-supplementary-material-SD3.pdf]

## SUPPLEMENTARY TABLES

**Supplementary Table 1. Descriptive statistics of the 10 cognitive test scores at baseline.**

| Test score             | N  | Minimum | Maximum | Mean   | SD     |
|------------------------|----|---------|---------|--------|--------|
| RAVLT immediate recall | 93 | 23      | 71      | 46.63  | 10.632 |
| RAVLT delayed recall   | 93 | 0       | 15      | 9.98   | 3.043  |
| Digit Span forward     | 93 | 5       | 16      | 10.65  | 2.636  |
| Digit Span backward    | 93 | 2       | 14      | 6.06   | 2.151  |
| Block Design           | 93 | 3       | 54      | 27.58  | 9.846  |
| CTT 1                  | 93 | 33      | 214     | 69.01  | 29.991 |
| CTT 2                  | 93 | 63      | 315     | 134.05 | 47.183 |
| SDMT written           | 93 | 6       | 59      | 31.97  | 11.871 |
| SDMT oral              | 93 | 4       | 67      | 39.13  | 13.431 |
| BNT                    | 93 | 10      | 30      | 22.10  | 5.351  |

**Supplementary Table 2. List of antibodies used in T-cell phenotyping panel.**

| Antibody | Fluorochrome | Clone  | Company         | Cat         |
|----------|--------------|--------|-----------------|-------------|
| CD3      | BV570        | UCHT1  | Biolegend       | 300436      |
| CD4      | A700         | OKT4   | Biolegend       | 317426      |
| CD8      | BV650        | RPA-T8 | BD              | 563821      |
| CD127    | APC          | A019D5 | Biolegend       | 351316      |
| CD25     | PE/Cy7       | M-A251 | Biolegend       | 356108      |
| CD27     | APC/Cy7      | M-T271 | Biolegend       | 356424      |
| CD45RO   | BV785        | UCHL1  | Biolegend       | 304234      |
| CD31     | BV605        | WM59   | Biolegend       | 303122      |
| CD57     | PerCP/Cy5.5  | HNK-1  | Biolegend       | 359622      |
| KLRG1    | PE-Vio615    | REA261 | Miltenyi Biotec | 130-108-366 |
| PD1      | BV421        | MIH4   | BD              | 564323      |
| CD95     | PE/Cy5       | DX2    | eBioscience     | 15-0959-42  |
| CD34     | PE           | 563    | BD              | 550761      |
| Vd1      | FITC         | REA173 | Miltenyi Biotec | 130-100-532 |
| L/D      | Aqua         |        | Life Tech       | L34966      |
